# Supplementary material for: In-solution patterning of standing up porphyrin based nanostructures within hydrogen bonded porous networks – a structural effect of a host matrix on guest entities
Source: Royal Society of Chemistry journal article supplement (doi:10.1039/c6cc01432a), 2016-01-01
Supplement: c6cc01432a1.pdf [file c6cc01432a1.pdf]

*Chem. Commun. Supporting Information*

**In-solution patterning of standing up porphyrin based nanostructures  
within hydrogen bonded porous networks – Structural effect of host  
matrix on guest entities**

Andrés Lombana, Nicolas Battaglini, Ghislain Tsague–Kenfac, Samia Zrig  
and Philippe Lang

nicolas.battaglini@univ-paris-diderot.fr; lang@univ-paris-diderot.fr

*Université Paris Diderot, Sorbonne Paris Cité, ITODYS, UMR 7086 CNRS*

*15 Rue J.-A. de Baïf, 75205 Paris Cedex 13, France.*

**Contents**

- 1) Network and SAM elaboration
- 2) STM experimental procedure
- 3) Apparent height histogram of porphyrin derivatives in the intrinsic SAM
- 4) PM-RAIRS experimental procedure and band assignment

## 1) Network and SAM elaboration – solution process

### a. Chemicals

**N,N-Dimethylformamide (DMF)** was purchased from Sigma-Aldrich (CHROMASOLV® Plus for HPLC, purity  $\geq 99.9\%$ ) and it was used without further purification.

**Dichloromethane (DCM)** GPR Rectapur® (purity 99% assay, 0.02% water) was purchased from VWR Chemicals. An extraction with a sodium carbonate ( $\text{Na}_2\text{CO}_3$ ) at 50 g/L in ultrapure water was performed. Before use, a distillation on column under ambient pressure has been realized.

**Perylene-3,4,9,10-tetracarboxylic-3,4,9,10-diimide (PTCDI)** was purchased from Alfa Aesar (purity  $> 98\%$ ) and has been used as received.

**1,3,5-triazine-2,4,6-triamine (melamine)** was purchased from Fluka, Sigma-Aldrich (HPLC, purity  $\geq 99.0\%$ ) and has been used as received.

### b. Au(111) substrate preparation

Au(111) slides were purchased from Phasis, Geneva. They consist in a 200 nm thick gold layer evaporated on mica. They were cleaned by immersion in 1/1 ultrapure water/ethanol mixture for 2 minutes and blown dry under an argon flow. An annealing step was then performed with 10 short passages in a hydrogen flame immediately before the immersion of the sample in solution.

### c. PTCDI-melamine network elaboration

A suspension of PTCDI at  $50 \text{ mg.L}^{-1}$  in DMF was prepared and then diluted to a concentration of  $3.2 \times 10^{-6} \text{ mol.L}^{-1}$ . In parallel, a solution of melamine at  $4 \times 10^{-3} \text{ mol.L}^{-1}$  in DMF was also prepared. The mixing of equal volumes of those two solutions resulted in a PTCDI melamine solution at  $1.8 \times 10^{-6} \text{ mol.L}^{-1}$  and  $2 \times 10^{-3} \text{ mol.L}^{-1}$  respectively. Such a solution was heated at  $100^\circ\text{C}$  for 45 minutes before dipping a clean Au(111) slide for 1.5 minutes at the same temperature. The slide was then briefly rinsed in purified DMF and blown dry under an argon flow.

### d. SAM elaboration

**Intrinsic PNiSAC SAM.** A solution of PNiSAC at  $10^{-5} \text{ mol.L}^{-1}$  was prepared in purified DCM and a freshly prepared gold slide was immersed inside for 5 minutes at room temperature. The sample was then rinsed by dipping twice the sample for 1.5 minute in purified DCM followed by drying under argon.

**Patterned PNiSAC SAM.** The back-filling of PTCDI melamine networks with PNiSAC was performed by immersing the templated Au(111) slide in a solution of PNiSAC following the protocol described above.

## 2) STM experimental procedure

STM studies were performed under ambient conditions using a Molecular Imaging PicoScan® microscope. STM image acquisition was done in the constant current mode with the following typical parameters:

**PTCDI melamine host network:** current set point ranging from 100 pA to 300 pA; bias voltage ranging from 100 mV to 300 mV.

**PNiSAc SAMs and host guest networks:** current set point ranging from 1 pA to 5 pA; bias voltage ranging from 200 mV to 500 mV.

Image processing was carried out with the free WSxM software.<sup>1</sup>

## 3) Apparent height histogram of porphyrin derivatives in the intrinsic SAM

The height histogram of PNiSAc in the intrinsic SAM has been measured over 160 protrusions attributed to single molecules in the STM image presented in Fig. 1b). STM contrast has been evaluated from a single reference area located at a domain wall. The distribution is relatively broad but exhibits a single peak, showing a single preferential adsorption of PNiSAc in that case.

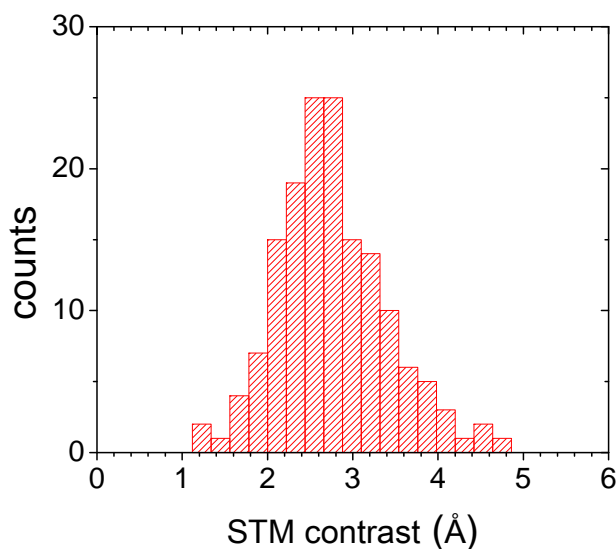

In addition, the STM contrast of bright protrusions, assigned to high density domains of PNiSAc, lies around 7 Å.

<sup>1</sup> Horcas, I.; Fernandez, R.; Gomez-Rodriguez, J.; Colchero, J.; Gómez-Herrero, J.; Baro, A. WSXM: A Software for Scanning Probe Microscopy and a Tool for Nanotechnology. *Rev. Sci. Instrum.* **2007**, 78, 013705.

#### 4) PM-RAIRS experimental procedure and band assignment

PM-IRRAS spectra were taken using a Nicolet 8700 spectrometer along with a photo-elastic modulator PEM-90 (Hind Instruments). Due to the typically weak signal of the samples, each spectrum resulted from the sum of at least 2000 scans with a resolution of 4 cm<sup>-1</sup> and an optical velocity 0.47 cm<sup>-1</sup>.

IR Absorption band attribution of PNiSAC:

| Wavenumbers cm <sup>-1</sup><br>TPP <sup>a</sup> / TPPNi <sup>b</sup> | Wavenumbers cm <sup>-1</sup><br>PNiSAC in KBr pellet | Assignment and <i>polarisation</i> of<br>PNiSAC in KBr pellet |
|-----------------------------------------------------------------------|------------------------------------------------------|---------------------------------------------------------------|
| 1597 / 1600                                                           | 1598                                                 | $\nu$ -C=C- phenyl, phenyl                                    |
| 1575 / 1576                                                           | 1578                                                 | phenyl-pyrrole <b>L</b>                                       |
| 1556 / 1550                                                           | 1552                                                 | $\nu$ -C=C- pyrrole <b>M</b>                                  |
| 1492 / 1492                                                           | 1490                                                 | $\nu$ -C=C- phenyl <b>M<sub>ph</sub></b>                      |
| 1460 / 1452                                                           | 1460                                                 | -C=N-                                                         |
| 1443 / 1443                                                           | 1441                                                 | $\delta$ C-H pyrrole <b>M</b>                                 |
| 1350 / 1351                                                           | 1350                                                 | $\nu$ ---C-N-                                                 |
| 1007                                                                  | 1018                                                 | $\rho$ C-H pyrrole <b>M</b>                                   |
| 1003 / 1023                                                           | 1004                                                 | $\rho$ C-H pyrrole <b>M</b>                                   |
| 966                                                                   |                                                      | $\rho$ C-H rocking pyrrole <b>M</b>                           |
| 799 / 794                                                             | 792                                                  | $\gamma$ C-H pyrrol ring <b>N</b>                             |
| 752 / 752                                                             | 755                                                  | $\gamma$ C-H phenyl <b>N<sub>ph</sub></b>                     |
| 699 / 695                                                             | 702                                                  | $\gamma$ C-H phenyl <b>N<sub>ph</sub></b>                     |

$\rho$ : rocking,  $\nu$ : stretching,  $\delta$ : bending,  $\gamma$ : out of plane bending

<sup>a</sup> TPP: Tetraphenyl Porphyrin

<sup>b</sup> TPPNi: Nickel Tetraphenyl Porphyrin
